# Supplementary material
Source: PubMed Central journal article supplement (PMC4174007)
Supplement: supp_M053363_jlr.M053363-1.pdf [file supp_M053363_jlr.M053363-1.pdf]

**Supplemental material for:**

**High-resolution imaging of dietary lipids in cells and tissues by  
NanoSIMS analysis**

**Haibo Jiang *et al.***

## Supplementary Figures

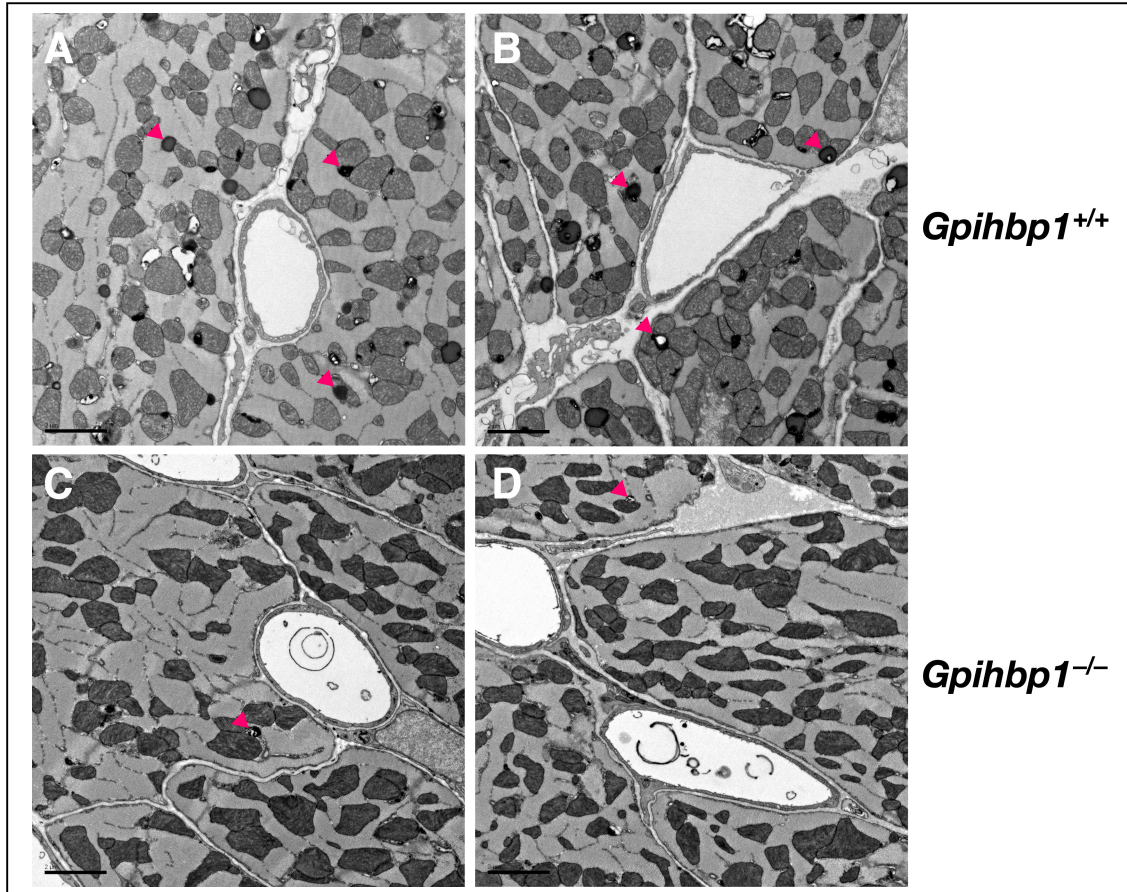

**Figure S1. Transmission electron micrographs of hearts from *Gpihbp1*<sup>+/+</sup> and *Gpihbp1*<sup>-/-</sup> mice.** (A–B) Numerous cytoplasmic lipid droplets (arrowheads) are detected throughout the myocardium of a wild-type (*Gpihbp1*<sup>+/+</sup>) mouse. (C–D) There are far fewer cytosolic lipid droplets in cardiomyocytes of *Gpihbp1*<sup>-/-</sup> mice. Scale bar, 2 μm.

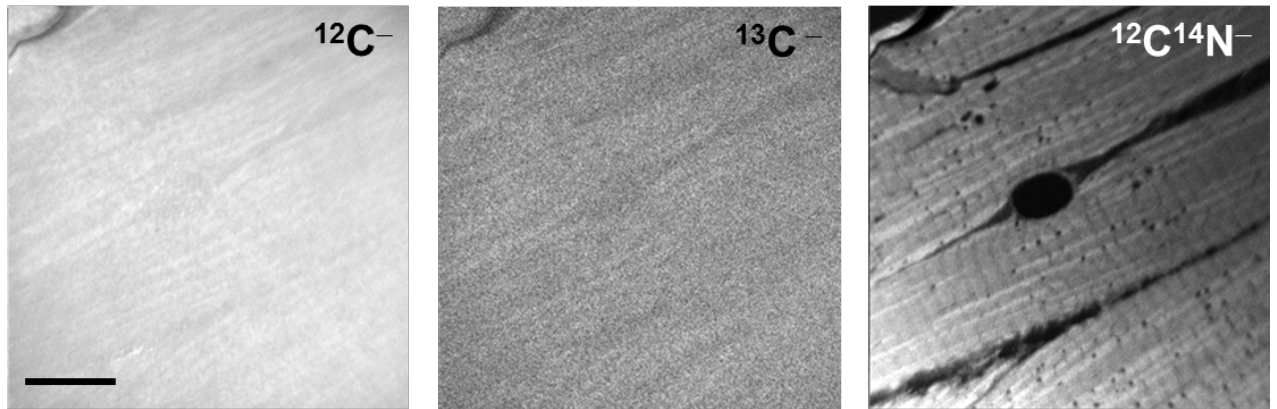

**Figure S2.**  $^{12}\text{C}^-$ ,  $^{13}\text{C}^-$ , and  $^{12}\text{C}^{14}\text{N}^-$  NanoSIMS images of the heart of a wild-type mouse that had not received any  $^{13}\text{C}$ -lipids. Scale bar, 10  $\mu\text{m}$ . Signal scales:  $^{12}\text{C}^-$  (left panel), 0–3500, with 3500 being white;  $^{13}\text{C}^-$  (middle panel), 0–100, with 100 being white.

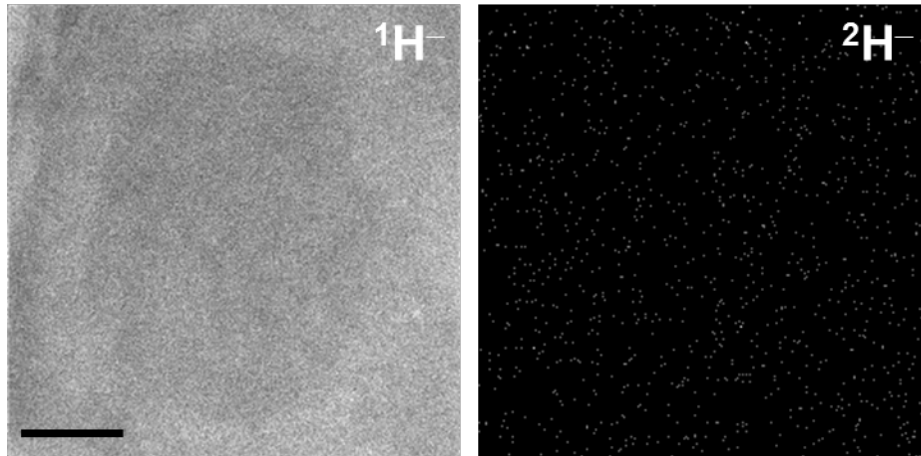

**Figure S3.  $^1\text{H}^-$  and  $^2\text{H}^-$  NanoSIMS images of a cell that had not received any  $^2\text{H}$ -lipids.** Scale bar, 3  $\mu\text{m}$ . Signal scales:  $^1\text{H}^-$  (left panel), 0–150, with 150 being white;  $^2\text{H}^-$  (right panel), 0–1, with 1 being white. Because the NanoSIMS 50 was tuned to detect  $^1\text{H}^-$  and  $^2\text{H}^-$ , it was not possible to generate a  $^{12}\text{C}^{14}\text{N}^-$  image.
